# Supplementary material
Source: publisher figshare collection journal article supplement (https://acs.figshare.com/ndownloader/files/4101292)
Supplement: Supplementary file 1 [file 4101292]

  
data_mo_dm11206_0m 
  
_audit_creation_method            SHELXL-97 
_chemical_name_systematic 
; 
 ? 
; 
_chemical_name_common             ? 
_chemical_melting_point           ? 
_chemical_formula_moiety          ? 
_chemical_formula_sum 
 'C25 H22 N2 O2' 
_chemical_formula_weight          382.45 
  
loop_ 
 _atom_type_symbol 
 _atom_type_description 
 _atom_type_scat_dispersion_real 
 _atom_type_scat_dispersion_imag 
 _atom_type_scat_source 
 'C'  'C'   0.0033   0.0016 
 'International Tables Vol C Tables 4.2.6.8 and 6.1.1.4' 
 'H'  'H'   0.0000   0.0000 
 'International Tables Vol C Tables 4.2.6.8 and 6.1.1.4' 
 'N'  'N'   0.0061   0.0033 
 'International Tables Vol C Tables 4.2.6.8 and 6.1.1.4' 
 'O'  'O'   0.0106   0.0060 
 'International Tables Vol C Tables 4.2.6.8 and 6.1.1.4' 
  
_symmetry_cell_setting            Triclinic 
_symmetry_space_group_name_H-M    P-1 
  
loop_ 
 _symmetry_equiv_pos_as_xyz 
 'x, y, z' 
 '-x, -y, -z' 
  
_cell_length_a                    8.5967(8) 
_cell_length_b                    10.5041(9) 
_cell_length_c                    12.0568(11) 
_cell_angle_alpha                 73.286(2) 
_cell_angle_beta                  75.763(2) 
_cell_angle_gamma                 82.041(2) 
_cell_volume                      1008.02(16) 
_cell_formula_units_Z             2 
_cell_measurement_temperature     133(2) 
_cell_measurement_reflns_used     8118 
_cell_measurement_theta_min       2.33 
_cell_measurement_theta_max       33.01 
  
_exptl_crystal_description        block 
_exptl_crystal_colour             colourless 
_exptl_crystal_size_max           0.30 
_exptl_crystal_size_mid           0.25 
_exptl_crystal_size_min           0.20 
_exptl_crystal_density_meas       ? 
_exptl_crystal_density_diffrn     1.260 
_exptl_crystal_density_method     'not measured' 
_exptl_crystal_F_000              404 
_exptl_absorpt_coefficient_mu     0.080 
_exptl_absorpt_correction_type    multi-scan 
_exptl_absorpt_correction_T_min   0.9763 
_exptl_absorpt_correction_T_max   0.9841 
_exptl_absorpt_process_details    sadabs
  
_exptl_special_details 
; 
 ? 
; 
  
_diffrn_ambient_temperature       133(2) 
_diffrn_radiation_wavelength      0.71073 
_diffrn_radiation_type            MoK\a 
_diffrn_radiation_source          'fine-focus sealed tube' 
_diffrn_radiation_monochromator   graphite 
_diffrn_measurement_device_type   'Bruker APEX-II CCD' 
_diffrn_measurement_method        '\f and \w scans' 
_diffrn_detector_area_resol_mean  ? 
_diffrn_standards_number          0 
_diffrn_standards_interval_count  ? 
_diffrn_standards_interval_time   ? 
_diffrn_standards_decay_%         ? 
_diffrn_reflns_number             15919 
_diffrn_reflns_av_R_equivalents   0.0205 
_diffrn_reflns_av_sigmaI/netI     0.0206 
_diffrn_reflns_limit_h_min        -10 
_diffrn_reflns_limit_h_max        10 
_diffrn_reflns_limit_k_min        -13 
_diffrn_reflns_limit_k_max        13 
_diffrn_reflns_limit_l_min        -15 
_diffrn_reflns_limit_l_max        15 
_diffrn_reflns_theta_min          1.81 
_diffrn_reflns_theta_max          27.00 
_reflns_number_total              4381 
_reflns_number_gt                 3727 
_reflns_threshold_expression      >2sigma(I) 
  
_computing_data_collection        'Bruker APEX2' 
_computing_cell_refinement        'Bruker SAINT' 
_computing_data_reduction         'Bruker SAINT' 
_computing_structure_solution     'SHELXS-97 (Sheldrick, 1990)' 
_computing_structure_refinement   'SHELXL-97 (Sheldrick, 1997)' 
_computing_molecular_graphics     'Bruker SHELXTL' 
_computing_publication_material   'Bruker SHELXTL' 
  
_refine_special_details 
; 
 Refinement of F^2^ against ALL reflections.  The weighted R-factor wR and 
 goodness of fit S are based on F^2^, conventional R-factors R are based 
 on F, with F set to zero for negative F^2^. The threshold expression of 
 F^2^ > 2sigma(F^2^) is used only for calculating R-factors(gt) etc. and is 
 not relevant to the choice of reflections for refinement.  R-factors based 
 on F^2^ are statistically about twice as large as those based on F, and R- 
 factors based on ALL data will be even larger. 
; 
  
_refine_ls_structure_factor_coef  Fsqd 
_refine_ls_matrix_type            full 
_refine_ls_weighting_scheme       calc 
_refine_ls_weighting_details 
 'calc w=1/[\s^2^(Fo^2^)+(0.0654P)^2^+0.3102P] where P=(Fo^2^+2Fc^2^)/3' 
_atom_sites_solution_primary      direct 
_atom_sites_solution_secondary    difmap 
_atom_sites_solution_hydrogens    geom 
_refine_ls_hydrogen_treatment     constr
_refine_ls_extinction_method      none 
_refine_ls_extinction_coef        ? 
_refine_ls_number_reflns          4381 
_refine_ls_number_parameters      263 
_refine_ls_number_restraints      0 
_refine_ls_R_factor_all           0.0481 
_refine_ls_R_factor_gt            0.0403 
_refine_ls_wR_factor_ref          0.1223 
_refine_ls_wR_factor_gt           0.1139 
_refine_ls_goodness_of_fit_ref    1.023 
_refine_ls_restrained_S_all       1.023 
_refine_ls_shift/su_max           0.000 
_refine_ls_shift/su_mean          0.000 
  
loop_ 
 _atom_site_label 
 _atom_site_type_symbol 
 _atom_site_fract_x 
 _atom_site_fract_y 
 _atom_site_fract_z 
 _atom_site_U_iso_or_equiv 
 _atom_site_adp_type 
 _atom_site_occupancy 
 _atom_site_symmetry_multiplicity 
 _atom_site_calc_flag 
 _atom_site_refinement_flags 
 _atom_site_disorder_assembly 
 _atom_site_disorder_group 
N1 N 0.1861(3) 0.84657(16) 0.7650(2) 0.0892(7) Uani 1 1 d . . . 
N2 N 0.62316(17) 0.35621(16) 0.87729(12) 0.0502(4) Uani 1 1 d . . . 
O1 O -0.03503(9) 0.58629(8) 0.67162(7) 0.02237(19) Uani 1 1 d . . . 
O2 O -0.34038(11) 0.39381(9) 0.57367(8) 0.0304(2) Uani 1 1 d . . . 
C1 C -0.17163(13) 0.65236(11) 0.63794(10) 0.0211(2) Uani 1 1 d . . . 
C2 C -0.19816(15) 0.78540(12) 0.64095(11) 0.0265(3) Uani 1 1 d . . . 
H2 H -0.1242 0.8258 0.6649 0.032 Uiso 1 1 calc R . . 
C3 C -0.33444(16) 0.85722(13) 0.60832(12) 0.0303(3) Uani 1 1 d . . . 
H3 H -0.3551 0.9477 0.6107 0.036 Uiso 1 1 calc R . . 
C4 C -0.44219(15) 0.79813(13) 0.57190(12) 0.0302(3) Uani 1 1 d . . . 
H4 H -0.5353 0.8486 0.5494 0.036 Uiso 1 1 calc R . . 
C5 C -0.41373(14) 0.66686(12) 0.56858(10) 0.0257(3) Uani 1 1 d . . . 
H5 H -0.4867 0.6274 0.5429 0.031 Uiso 1 1 calc R . . 
C6 C -0.27708(13) 0.59102(12) 0.60304(10) 0.0215(2) Uani 1 1 d . . . 
C7 C -0.24543(14) 0.45028(11) 0.60130(10) 0.0221(2) Uani 1 1 d . . . 
C8 C -0.09558(13) 0.38360(11) 0.63585(10) 0.0199(2) Uani 1 1 d . . . 
C9 C -0.04524(14) 0.24885(11) 0.63788(10) 0.0222(2) Uani 1 1 d . . . 
C10 C 0.09593(14) 0.19496(11) 0.67381(10) 0.0228(2) Uani 1 1 d . . . 
H10 H 0.1293 0.1044 0.6757 0.027 Uiso 1 1 calc R . . 
C11 C 0.19207(13) 0.26845(11) 0.70765(10) 0.0208(2) Uani 1 1 d . . . 
C12 C 0.14591(13) 0.40108(11) 0.70631(9) 0.0198(2) Uani 1 1 d . . . 
C13 C 0.00212(13) 0.45507(11) 0.67040(9) 0.0192(2) Uani 1 1 d . . . 
C14 C -0.13889(16) 0.16160(12) 0.60174(12) 0.0298(3) Uani 1 1 d . . . 
H14A H -0.0807 0.0738 0.6064 0.045 Uiso 1 1 calc R . . 
H14B H -0.1514 0.2029 0.5202 0.045 Uiso 1 1 calc R . . 
H14C H -0.2452 0.1515 0.6552 0.045 Uiso 1 1 calc R . . 
C15 C 0.34424(14) 0.19907(12) 0.74726(10) 0.0229(2) Uani 1 1 d . . . 
H15A H 0.3768 0.1191 0.7168 0.028 Uiso 1 1 calc R . . 
H15B H 0.4323 0.2599 0.7133 0.028 Uiso 1 1 calc R . . 
C16 C 0.31894(14) 0.15845(12) 0.88004(11) 0.0262(3) Uani 1 1 d . . . 
C17 C 0.18469(19) 0.07370(16) 0.95666(13) 0.0427(4) Uani 1 1 d . . . 
H17A H 0.1887 -0.0088 0.9317 0.051 Uiso 1 1 calc R . . 
H17B H 0.0787 0.1231 0.9520 0.051 Uiso 1 1 calc R . . 
C18 C 0.2133(2) 0.04117(17) 1.08215(13) 0.0473(4) Uani 1 1 d . . . 
H18A H 0.2566 -0.0525 1.1069 0.057 Uiso 1 1 calc R . . 
H18B H 0.1113 0.0541 1.1389 0.057 Uiso 1 1 calc R . . 
C19 C 0.3346(2) 0.13630(18) 1.07899(13) 0.0470(4) Uani 1 1 d . . . 
H19A H 0.2816 0.2075 1.1172 0.056 Uiso 1 1 calc R . . 
H19B H 0.4215 0.0880 1.1190 0.056 Uiso 1 1 calc R . . 
C20 C 0.39926(15) 0.19293(13) 0.94760(11) 0.0304(3) Uani 1 1 d . . . 
C21 C 0.52491(17) 0.28236(15) 0.90553(12) 0.0356(3) Uani 1 1 d . . . 
C22 C 0.24079(14) 0.48929(11) 0.73996(10) 0.0230(2) Uani 1 1 d . . . 
H22A H 0.2429 0.5780 0.6821 0.028 Uiso 1 1 calc R . . 
H22B H 0.3531 0.4504 0.7354 0.028 Uiso 1 1 calc R . . 
C23 C 0.17049(16) 0.50623(13) 0.86504(11) 0.0297(3) Uani 1 1 d . . . 
H23A H 0.0545 0.5347 0.8730 0.036 Uiso 1 1 calc R . . 
H23B H 0.1811 0.4194 0.9239 0.036 Uiso 1 1 calc R . . 
C24 C 0.2559(2) 0.60927(16) 0.89141(16) 0.0474(4) Uani 1 1 d . . . 
H24A H 0.2214 0.6060 0.9767 0.057 Uiso 1 1 calc R . . 
H24B H 0.3736 0.5872 0.8736 0.057 Uiso 1 1 calc R . . 
C25 C 0.2194(2) 0.74342(17) 0.82073(19) 0.0547(5) Uani 1 1 d . . . 
  
loop_ 
 _atom_site_aniso_label 
 _atom_site_aniso_U_11 
 _atom_site_aniso_U_22 
 _atom_site_aniso_U_33 
 _atom_site_aniso_U_23 
 _atom_site_aniso_U_13 
 _atom_site_aniso_U_12 
N1 0.0986(15) 0.0335(8) 0.1172(17) -0.0290(10) 0.0184(12) 0.0005(9) 
N2 0.0490(8) 0.0775(10) 0.0326(7) -0.0166(6) -0.0128(6) -0.0210(7) 
O1 0.0224(4) 0.0216(4) 0.0272(4) -0.0083(3) -0.0110(3) -0.0011(3) 
O2 0.0291(5) 0.0321(5) 0.0357(5) -0.0066(4) -0.0161(4) -0.0091(4) 
C1 0.0200(5) 0.0258(6) 0.0173(5) -0.0049(4) -0.0048(4) -0.0017(4) 
C2 0.0287(6) 0.0277(6) 0.0261(6) -0.0102(5) -0.0084(5) -0.0012(5) 
C3 0.0337(7) 0.0278(6) 0.0303(6) -0.0102(5) -0.0093(5) 0.0046(5) 
C4 0.0251(6) 0.0353(7) 0.0281(6) -0.0058(5) -0.0087(5) 0.0042(5) 
C5 0.0216(6) 0.0334(6) 0.0215(6) -0.0038(5) -0.0061(4) -0.0041(5) 
C6 0.0205(5) 0.0268(6) 0.0166(5) -0.0034(4) -0.0040(4) -0.0042(4) 
C7 0.0222(5) 0.0269(6) 0.0177(5) -0.0031(4) -0.0051(4) -0.0078(4) 
C8 0.0209(5) 0.0233(5) 0.0163(5) -0.0036(4) -0.0046(4) -0.0067(4) 
C9 0.0256(6) 0.0233(6) 0.0183(5) -0.0035(4) -0.0046(4) -0.0085(4) 
C10 0.0273(6) 0.0205(5) 0.0205(5) -0.0042(4) -0.0048(4) -0.0045(4) 
C11 0.0212(5) 0.0237(5) 0.0164(5) -0.0036(4) -0.0031(4) -0.0034(4) 
C12 0.0197(5) 0.0241(5) 0.0161(5) -0.0047(4) -0.0033(4) -0.0055(4) 
C13 0.0212(5) 0.0207(5) 0.0159(5) -0.0045(4) -0.0032(4) -0.0045(4) 
C14 0.0336(7) 0.0251(6) 0.0353(7) -0.0080(5) -0.0123(5) -0.0092(5) 
C15 0.0230(5) 0.0241(5) 0.0220(6) -0.0063(4) -0.0059(4) -0.0004(4) 
C16 0.0253(6) 0.0259(6) 0.0240(6) -0.0026(5) -0.0062(5) 0.0022(5) 
C17 0.0456(8) 0.0439(8) 0.0315(7) 0.0042(6) -0.0053(6) -0.0158(7) 
C18 0.0437(8) 0.0540(9) 0.0295(7) 0.0058(7) -0.0020(6) -0.0014(7) 
C19 0.0514(9) 0.0611(10) 0.0230(7) -0.0026(6) -0.0104(6) 0.0004(7) 
C20 0.0287(6) 0.0374(7) 0.0232(6) -0.0052(5) -0.0090(5) 0.0042(5) 
C21 0.0345(7) 0.0524(8) 0.0246(6) -0.0123(6) -0.0135(5) -0.0015(6) 
C22 0.0219(5) 0.0242(5) 0.0263(6) -0.0075(4) -0.0093(5) -0.0037(4) 
C23 0.0364(7) 0.0312(6) 0.0276(6) -0.0119(5) -0.0144(5) -0.0001(5) 
C24 0.0527(9) 0.0503(9) 0.0585(10) -0.0333(8) -0.0277(8) 0.0008(7) 
C25 0.0540(10) 0.0402(9) 0.0774(13) -0.0370(9) -0.0012(9) -0.0056(7) 
  
_geom_special_details 
; 
 All esds (except the esd in the dihedral angle between two l.s. planes) 
 are estimated using the full covariance matrix.  The cell esds are taken 
 into account individually in the estimation of esds in distances, angles 
 and torsion angles; correlations between esds in cell parameters are only 
 used when they are defined by crystal symmetry.  An approximate (isotropic) 
 treatment of cell esds is used for estimating esds involving l.s. planes. 
; 
  
loop_ 
 _geom_bond_atom_site_label_1 
 _geom_bond_atom_site_label_2 
 _geom_bond_distance 
 _geom_bond_site_symmetry_2 
 _geom_bond_publ_flag 
N1 C25 1.139(3) . ? 
N2 C21 1.149(2) . ? 
O1 C1 1.3683(14) . ? 
O1 C13 1.3745(13) . ? 
O2 C7 1.2291(14) . ? 
C1 C6 1.3855(16) . ? 
C1 C2 1.3939(16) . ? 
C2 C3 1.3811(18) . ? 
C2 H2 0.9500 . ? 
C3 C4 1.3972(19) . ? 
C3 H3 0.9500 . ? 
C4 C5 1.3771(18) . ? 
C4 H4 0.9500 . ? 
C5 C6 1.4063(16) . ? 
C5 H5 0.9500 . ? 
C6 C7 1.4709(16) . ? 
C7 C8 1.4730(16) . ? 
C8 C13 1.4033(15) . ? 
C8 C9 1.4167(16) . ? 
C9 C10 1.3814(17) . ? 
C9 C14 1.5115(15) . ? 
C10 C11 1.4033(16) . ? 
C10 H10 0.9500 . ? 
C11 C12 1.3914(16) . ? 
C11 C15 1.5210(16) . ? 
C12 C13 1.4017(16) . ? 
C12 C22 1.5089(15) . ? 
C14 H14A 0.9800 . ? 
C14 H14B 0.9800 . ? 
C14 H14C 0.9800 . ? 
C15 C16 1.5013(16) . ? 
C15 H15A 0.9900 . ? 
C15 H15B 0.9900 . ? 
C16 C20 1.3369(18) . ? 
C16 C17 1.5049(18) . ? 
C17 C18 1.526(2) . ? 
C17 H17A 0.9900 . ? 
C17 H17B 0.9900 . ? 
C18 C19 1.528(2) . ? 
C18 H18A 0.9900 . ? 
C18 H18B 0.9900 . ? 
C19 C20 1.5129(19) . ? 
C19 H19A 0.9900 . ? 
C19 H19B 0.9900 . ? 
C20 C21 1.430(2) . ? 
C22 C23 1.5321(17) . ? 
C22 H22A 0.9900 . ? 
C22 H22B 0.9900 . ? 
C23 C24 1.5314(18) . ? 
C23 H23A 0.9900 . ? 
C23 H23B 0.9900 . ? 
C24 C25 1.459(3) . ? 
C24 H24A 0.9900 . ? 
C24 H24B 0.9900 . ? 
  
loop_ 
 _geom_angle_atom_site_label_1 
 _geom_angle_atom_site_label_2 
 _geom_angle_atom_site_label_3 
 _geom_angle 
 _geom_angle_site_symmetry_1 
 _geom_angle_site_symmetry_3 
 _geom_angle_publ_flag 
C1 O1 C13 120.01(9) . . ? 
O1 C1 C6 122.16(10) . . ? 
O1 C1 C2 115.80(10) . . ? 
C6 C1 C2 122.03(11) . . ? 
C3 C2 C1 118.48(11) . . ? 
C3 C2 H2 120.8 . . ? 
C1 C2 H2 120.8 . . ? 
C2 C3 C4 120.68(11) . . ? 
C2 C3 H3 119.7 . . ? 
C4 C3 H3 119.7 . . ? 
C5 C4 C3 120.16(11) . . ? 
C5 C4 H4 119.9 . . ? 
C3 C4 H4 119.9 . . ? 
C4 C5 C6 120.26(11) . . ? 
C4 C5 H5 119.9 . . ? 
C6 C5 H5 119.9 . . ? 
C1 C6 C5 118.38(11) . . ? 
C1 C6 C7 120.53(10) . . ? 
C5 C6 C7 121.09(10) . . ? 
O2 C7 C6 121.09(11) . . ? 
O2 C7 C8 123.33(11) . . ? 
C6 C7 C8 115.58(10) . . ? 
C13 C8 C9 117.68(10) . . ? 
C13 C8 C7 119.13(10) . . ? 
C9 C8 C7 123.19(10) . . ? 
C10 C9 C8 118.66(10) . . ? 
C10 C9 C14 118.52(10) . . ? 
C8 C9 C14 122.82(10) . . ? 
C9 C10 C11 122.70(10) . . ? 
C9 C10 H10 118.6 . . ? 
C11 C10 H10 118.6 . . ? 
C12 C11 C10 119.95(10) . . ? 
C12 C11 C15 121.53(10) . . ? 
C10 C11 C15 118.51(10) . . ? 
C11 C12 C13 117.12(10) . . ? 
C11 C12 C22 124.28(10) . . ? 
C13 C12 C22 118.60(10) . . ? 
O1 C13 C12 113.54(9) . . ? 
O1 C13 C8 122.57(10) . . ? 
C12 C13 C8 123.90(10) . . ? 
C9 C14 H14A 109.5 . . ? 
C9 C14 H14B 109.5 . . ? 
H14A C14 H14B 109.5 . . ? 
C9 C14 H14C 109.5 . . ? 
H14A C14 H14C 109.5 . . ? 
H14B C14 H14C 109.5 . . ? 
C16 C15 C11 111.34(9) . . ? 
C16 C15 H15A 109.4 . . ? 
C11 C15 H15A 109.4 . . ? 
C16 C15 H15B 109.4 . . ? 
C11 C15 H15B 109.4 . . ? 
H15A C15 H15B 108.0 . . ? 
C20 C16 C15 128.25(11) . . ? 
C20 C16 C17 110.26(12) . . ? 
C15 C16 C17 121.42(11) . . ? 
C16 C17 C18 104.91(12) . . ? 
C16 C17 H17A 110.8 . . ? 
C18 C17 H17A 110.8 . . ? 
C16 C17 H17B 110.8 . . ? 
C18 C17 H17B 110.8 . . ? 
H17A C17 H17B 108.8 . . ? 
C17 C18 C19 106.60(12) . . ? 
C17 C18 H18A 110.4 . . ? 
C19 C18 H18A 110.4 . . ? 
C17 C18 H18B 110.4 . . ? 
C19 C18 H18B 110.4 . . ? 
H18A C18 H18B 108.6 . . ? 
C20 C19 C18 103.10(12) . . ? 
C20 C19 H19A 111.1 . . ? 
C18 C19 H19A 111.1 . . ? 
C20 C19 H19B 111.1 . . ? 
C18 C19 H19B 111.1 . . ? 
H19A C19 H19B 109.1 . . ? 
C16 C20 C21 125.67(12) . . ? 
C16 C20 C19 112.98(13) . . ? 
C21 C20 C19 121.16(12) . . ? 
N2 C21 C20 176.34(15) . . ? 
C12 C22 C23 112.67(9) . . ? 
C12 C22 H22A 109.1 . . ? 
C23 C22 H22A 109.1 . . ? 
C12 C22 H22B 109.1 . . ? 
C23 C22 H22B 109.1 . . ? 
H22A C22 H22B 107.8 . . ? 
C24 C23 C22 111.68(12) . . ? 
C24 C23 H23A 109.3 . . ? 
C22 C23 H23A 109.3 . . ? 
C24 C23 H23B 109.3 . . ? 
C22 C23 H23B 109.3 . . ? 
H23A C23 H23B 107.9 . . ? 
C25 C24 C23 111.11(13) . . ? 
C25 C24 H24A 109.4 . . ? 
C23 C24 H24A 109.4 . . ? 
C25 C24 H24B 109.4 . . ? 
C23 C24 H24B 109.4 . . ? 
H24A C24 H24B 108.0 . . ? 
N1 C25 C24 177.6(2) . . ? 
  
_diffrn_measured_fraction_theta_max    0.996 
_diffrn_reflns_theta_full              27.00 
_diffrn_measured_fraction_theta_full   0.996 
_refine_diff_density_max    0.279 
_refine_diff_density_min   -0.201 
_refine_diff_density_rms    0.040 
